# Supplementary material
Source: Springer Nature journal article supplement (https://www.springermedizin.de/resource/supplementary/40345_2013_12_MOESM5_ESM.pdf/25658290)

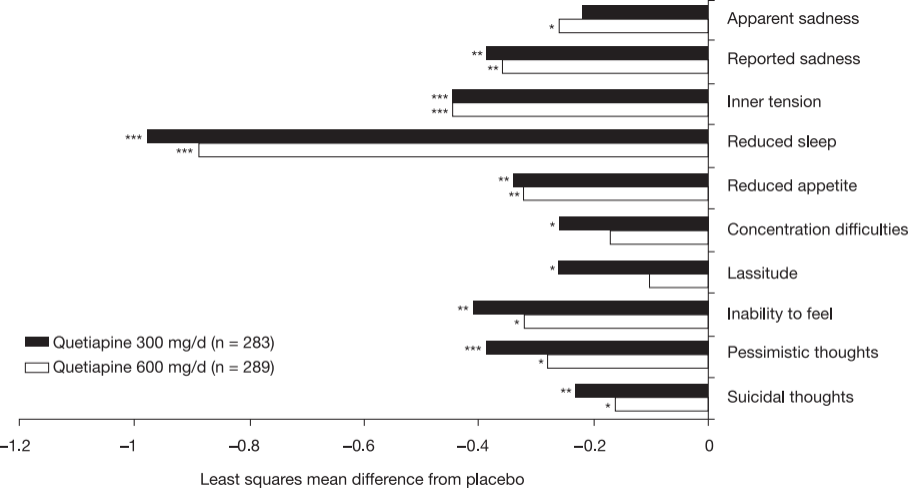

\*p < 0.05; \*\*p < 0.01; \*\*\*p < 0.001 vs placebo

Supplement: MOESM5 [file 25658290]
